# Supplementary material
Source: PubMed Central journal article supplement (PMC5361764)
Supplement: Supp_Fig1.pdf [file Supp_Fig1.pdf]

## Supplementary Data

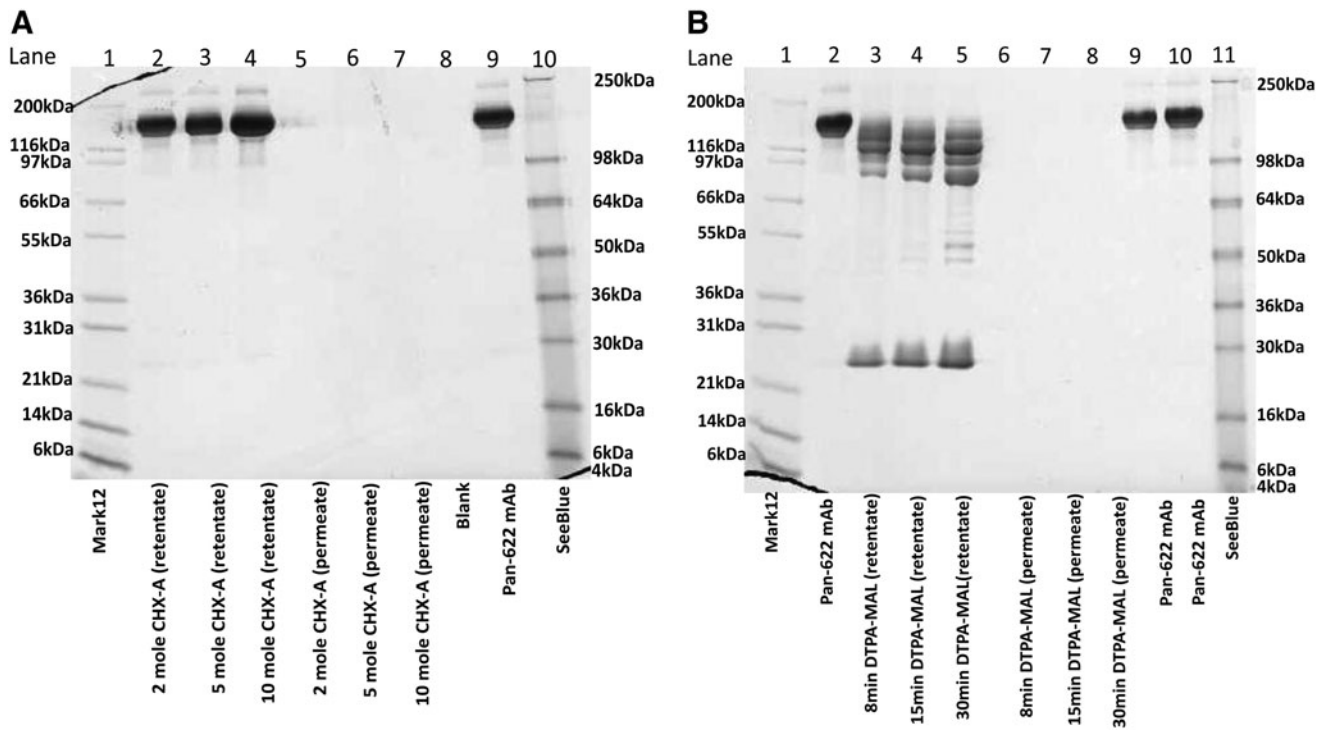

**SUPPLEMENTARY FIG. S1.** Structural evaluation of PAN-622 conjugates: **(A)** nonreducing SDS-PAGE of PAN-622 CHX-A' conjugates; **(B)** nonreducing SDS-PAGE of PAN-622 DTPA-MAL conjugates. SDS-PAGE, sodium dodecyl sulfate/polyacrylamide gel electrophoresis.
